# Supplementary material
Source: publisher site journal article supplement (https://www.dovepress.com/article/427350)
Supplement: Supplementary file 1 [file get_supplementary_file.php]

**Supplementary Table 1.** Primer sequences used in the assessment of gene expression by RT-qPCR (human nucleotide sequence).

| Gene           | Forward sequence (5'-3')  | Reverse sequence (5'-3') |
|----------------|---------------------------|--------------------------|
| CD80           | CTGCCTGACCTACTGCTTIG      | GGCGTACACTTTCCCTTCTC     |
| CD163          | ACATAGATCATGCATCTGTCATTTG | ATTCTCGGAATCTCACTTCTA    |
| CD200R         | GAGCAATGGCACAGTGACTGTT    | GTGGCAGGTCACGGTAGACA     |
| $\beta$ -actin | AGAGCTACGAGCTGCCTGAC      | AGCACTGTGTTGGCGTACAG     |
| TNF- $\alpha$  | AGGCGCTCCCAAGAAGACA       | TCCTTGGCAAACTGCACCT      |
| IL-1 $\beta$   | GCAGTCTACACAGCTTCGGG      | CCGCCTCAGCCTCCCAAAG      |
| IL-6           | GGCTGCTCCTGGTGTTC         | TCTGAAGAGGTGAGTGGCTGTC   |
| IL-8           | CAGTTTGGCCAAGAAGTGCTAAAG  | GGGTGGAAGGTTTGGAGTATGTC  |
| IL-10          | TTGCTGGAGGACTTTAAGGGTTAC  | CCTGATGTCTGGGTCTTGGTTCTC |
| IL-12          | CCAGAGCAGTGAGGTCTTAGGC    | GTGAAGCAGCAGGAGCGAATG    |

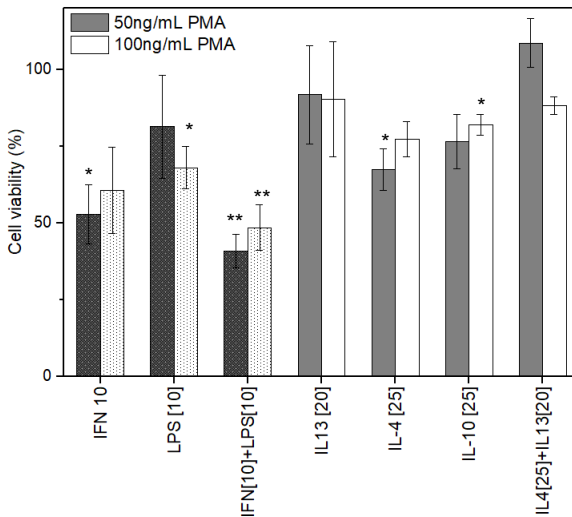

**Supplementary Figure 1** Polarizing agents-induced cytotoxicity of macrophages in function of PMA concentrations. Cytotoxicity of M1 (dots plots) or M2 (empty plots) polarizing agents assessed by crystal violet test after 48h or 72h respectively. \*  $p < 0,05$  ; \*\*  $p < 0.01$  using Student's t-test analysis as compared with PMA alone.

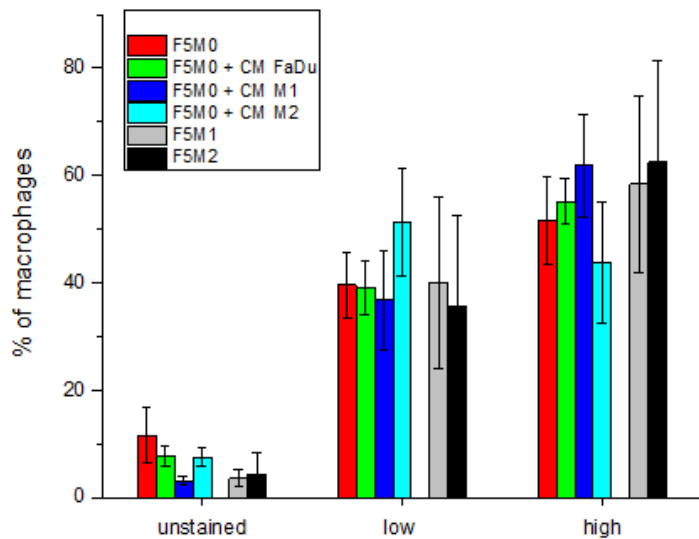

**Supplementary Figure 2.** Distribution of Foslip in macrophages in spheroids by flow cytometry.
